# Supplementary material for: Transcriptomic Analysis Reveals Candidate Genes in Response to Sorghum Mosaic Virus and Salicylic Acid in Sugarcane
Source: MDPI journal article supplement (doi:10.3390/plants13020234), 2024-01-14
Supplement: s1 [file s1]

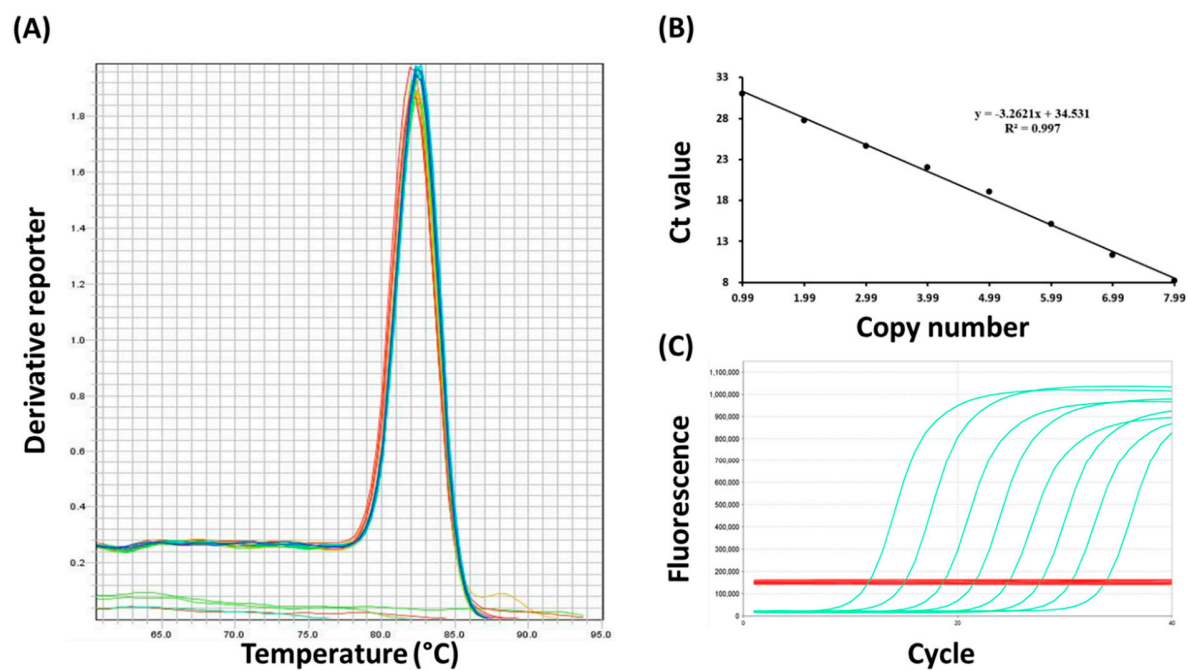

**Figure S1.** (A) Melt, (B) standard, and (C) amplification curves for determination of SrMV contents in sugarcane leaves.

**Table S1.** Primers used for qRT-PCR to detect genes expression. IDT online software (<https://sg.idtdna.com/PrimerQuest/Home/Index>) was used to design genes specific primers for qRT-PCR.

| Gene ID                   | Primer      | Primer sequence(5'~3')                                 |
|---------------------------|-------------|--------------------------------------------------------|
| <i>Soff.04G0004130-3G</i> | q-PAL-F/R   | F: AGAAGATTTGGGTCGTGTTGG<br>R: TCCTCGGACCTGTTGATCTT    |
| <i>novel.4754</i>         | q-ABA-F/R   | F: GTTTGTGTCCGTTCTGGATTTG<br>R: GCGGACCTTCTCACTCTTATG  |
| <i>Soff.02G0015160-6G</i> | q-PR1a-F/R  | F: CGGGAAGGCCATCTACATAGT<br>R: CAAGTTGAAGAGGTGGGTGTTG  |
| <i>Soff.02G0015160-2C</i> | q-PR1b-F/R  | F: GGCTAAGAAGGCCTGTGATTT<br>R: CCAGATGGAGCAACACCAATA   |
| <i>Soff.04G0005200-4F</i> | q-PR1c-F/R  | F: GTGGATCTGGTCGAAATACAA<br>R: CTCACCACCCTTCCCAATAAC   |
| <i>Soff.04G0021370-3D</i> | q-ICS-F/R   | F: GTTGACTGTTTGCAGGTTTG<br>R: CCCTTGTTCTGCCTTCTCTATG   |
| <i>novel.18733</i>        | q-NPR1a-F/R | F: CCGTGGTCCATGTTCTACATTA<br>R: CTCGAGATCGACCTCCAAATTC |
| <i>novel.23616</i>        | q-NPR1b-F/R | F: CCGTGGTCCATGTTCTACATTA<br>R: CTCGAGATCGACCTCCAAATTC |
| <i>GAPDH</i>              | GAPDH       | F: AAGGGTGGTGCCAAGAAGG<br>R: CAAGGGGAGCAAGGCAGTT       |
